# Supplementary material for: Nuclear and Cytoplasmic Accumulation of Ep-ICD Is Frequently Detected in Human Epithelial Cancers
Source: PubMed Central journal article supplement (PMC2994724; doi:10.1371/journal.pone.0014130), 2010-11-30
Supplement: pone.0014130.s002.pdf [file pone.0014130.s002.pdf]

**Supplementary Table S1 - Ep-ICD Accumulation and Clinical Parameters of Prostate Cancer Patients**

| n  | Age | Sex | Organ    | Diagnosis | Gleason score | pTNM    | Stage | Tissue type* | PSA (ng/ml) | Residual tumor | Follow-up months | Follow-up result | Ep-ICD Nucleus | Ep-ICD Cytoplasm | Ep-ICD Membrane |
|----|-----|-----|----------|-----------|---------------|---------|-------|--------------|-------------|----------------|------------------|------------------|----------------|------------------|-----------------|
| 1  | 60  | M   | Prostate | AC        | 9             | T3bN0M0 | III   | 6            | 11.2        | R0             | 60               | alive            | 2.5            | 6                | 5               |
| 2  | 64  | M   | Prostate | AC        | 7             | T2cN0M0 | II    | 6            | 30          | R0             | 60               | alive            | 4.8            | 5.3              | 0.7             |
| 3  | 71  | M   | Prostate | AC        | 9             | T3bN0M0 | III   | 6            | 60.4        | R1             | 55               | alive            | 5.7            | 5.3              | 0.7             |
| 4  | 64  | M   | Prostate | AC        | 10            | T3aN0M0 | III   | 6            | 7.4         | R1             | 47               | alive            | 5.3            | 2.2              | 0               |
| 5  | 59  | M   | Prostate | AC        | 9             | T3bN0M0 | III   | 6            | 9.8         | R1             | 44               | alive            | 3.8            | 3.8              | 1               |
| 6  | 65  | M   | Prostate | AC        | 8             | T4N0M0  | IV    | 6            | 34.9        | R1             | 43               | alive            | 0.5            | 5.3              | 5.3             |
| 7  | 73  | M   | Prostate | AC        | 7             | T2cN0M0 | II    | 6            | 48.1        | R1             | 42               | alive            | 4.7            | 0.8              | 0.2             |
| 8  | 69  | M   | Prostate | AC        | 7             | T2cN0M0 | II    | 6            | 10.6        | R0             | 42               | alive            | 5              | 5.2              | 4               |
| 9  | 62  | M   | Prostate | AC        | 7             | T2cN0M0 | II    | 6            | 37.3        | R1             | 39               | alive            | 5.7            | 4.8              | 0.8             |
| 10 | 66  | M   | Prostate | AC        | 9             | T3bN0M0 | III   | 6            | 1.2         | R1             | 39               | alive            | 0              | 0                | 0               |
| 11 | 60  | M   | Prostate | AC        | 9             | T3bN0M0 | III   | 6            | 40          | R1             | 39               | alive            | 5.7            | 5.2              | 3.2             |
| 12 | 66  | M   | Prostate | AC        | 7             | T3aN0M0 | III   | 6            | 8.4         | R1             | 39               | alive            | 5.7            | 4.7              | 3               |
| 13 | 70  | M   | Prostate | AC        | 7             | T4N0M0  | IV    | 6            | 7           | R1             | 37               | alive            | 6.7            | 5                | 0.8             |

|    |    |   |          |    |   |         |     |   |      |    |    |       |     |     |     |
|----|----|---|----------|----|---|---------|-----|---|------|----|----|-------|-----|-----|-----|
| 14 | 65 | M | Prostate | AC | 9 | T3bN0M0 | III | 6 | 17.5 | R1 | 23 | dead  | 5.5 | 5.2 | 4.7 |
| 15 | 67 | M | Prostate | AC | 9 | T3bN1M0 | IV  | 6 | 13.1 | R1 | 34 | alive | 5   | 4.7 | 0.8 |
| 16 | 69 | M | Prostate | AC | 7 | T3bN0M0 | III | 6 | 1.1  | R1 | 33 | alive | 3.8 | 4.2 | 3.8 |
| 17 | 63 | M | Prostate | AC | 9 | T3aN1M0 | IV  | 6 | 11.8 | R1 | 33 | alive | 0   | 0   | 0   |
| 18 | 69 | M | Prostate | AC | 7 | T3aN0M0 | III | 6 | 17.6 | R1 | 27 | alive | 5.8 | 4.8 | 3.3 |
| 19 | 70 | M | Prostate | AC | 7 | T3aN0M0 | III | 6 | 9    | R1 | 26 | alive | 5   | 4.8 | 0.7 |
| 20 | 58 | M | Prostate | AC | 9 | T3bN0M0 | III | 6 | 5.8  | R0 | 26 | alive | 4.8 | 5.3 | 0.8 |
| 21 | 58 | M | Prostate | AC | 7 | T3bN0M0 | III | 6 | 15.8 | R1 | 24 | alive | 5.3 | 5.8 | 2.3 |
| 22 | 71 | M | Prostate | AC | 7 | T2cN0M0 | II  | 6 | 31.4 | R1 | 24 | alive | 5.3 | 4.8 | 1.7 |
| 23 | 70 | M | Prostate | AC | 7 | T3bN0M0 | III | 6 | 14.4 | R1 | 19 | alive | 5.5 | 5.8 | 0.8 |
| 24 | 59 | M | Prostate | AC | 6 | T2bN0M0 | II  | 6 | 18.3 | R0 | 18 | alive | 6   | 4.7 | 4   |
| 25 | 63 | M | Prostate | AC | 9 | T3bN0M0 | III | 6 | 16.6 | R1 | 17 | alive | 5.5 | 4.8 | 3.8 |
| 26 | 72 | M | Prostate | AC | 9 | T3bN0M0 | III | 6 | .    | R1 | 16 | alive | 0   | 0   | 0   |
| 27 | 66 | M | Prostate | AC | 8 | T3bN0M0 | III | 6 | 10.8 | R1 | 17 | dead  | 6   | 5.2 | 0.5 |
| 28 | 70 | M | Prostate | AC | 6 | T3bN0M0 | III | 6 | 10.8 | R1 | 16 | alive | 5.2 | 5.2 | 0.8 |
| 29 | 70 | M | Prostate | AC | 7 | T2cN0M0 | II  | 6 | .    | R0 | 15 | alive | 5.7 | 4.8 | 2.9 |

|    |    |   |          |    |    |         |     |   |      |    |    |       |     |     |     |
|----|----|---|----------|----|----|---------|-----|---|------|----|----|-------|-----|-----|-----|
| 30 | 68 | M | Prostate | AC | 8  | T3bN0M0 | III | 6 | 26.9 | R1 | 15 | alive | 5.7 | 4.8 | 5   |
| 31 | 63 | M | Prostate | AC | 10 | T3bN0M0 | III | 6 | .    | R1 | 15 | alive | 5.3 | 5.7 | 0.7 |
| 32 | 57 | M | Prostate | AC | 7  | T3bN0M0 | III | 6 | 25   | R1 | 15 | alive | 5.2 | 5.2 | 4.8 |
| 33 | 72 | M | Prostate | AC | 8  | T2cN0M0 | II  | 6 | 16.8 | R1 | 15 | alive | 5.2 | 4   | 3.5 |
| 34 | 70 | M | Prostate | AC | 8  | T3bN0M0 | III | 6 | 0.5  | R1 | 15 | alive | 2.8 | 1.3 | 0.8 |
| 35 | 75 | M | Prostate | AC | 9  | T3bN0M0 | III | 6 | 98   | R1 | 15 | alive | 5.5 | 5.3 | 2.7 |
| 36 | 62 | M | Prostate | AC | 9  | T3bN0M0 | III | 6 | .    | R1 | 15 | alive | 4.5 | 5   | 4   |
| 37 | 63 | M | Prostate | AC | 9  | T3bN0M0 | III | 6 | 91   | R1 | 14 | alive | 5.5 | 5   | 1   |
| 38 | 53 | M | Prostate | AC | 9  | T3bN0M0 | III | 6 | 161  | R1 | 17 | dead  | 4.8 | 5   | 4   |
| 39 | 63 | M | Prostate | AC | 8  | T3bN0M0 | III | 6 | 13   | R1 | 13 | alive | 5.3 | 4.8 | 1.2 |
| 40 | 44 | M | Prostate | AC | 7  | T3bN0M0 | III | 6 | .    | R1 | 11 | alive | 5   | 4.8 | 0.8 |
| 41 | 85 | M | Prostate | AC |    | TxN0M1  | IV  | 6 | .    | .  | .  | .     | 4.7 | 3.4 | 2.9 |
| 42 | 79 | M | Prostate | AC |    | T2aN0M1 | IV  | 6 | .    | .  | .  | .     | 6   | 4   | 1   |
| 43 | 53 | M | Prostate | AC |    | T2aN0M1 | IV  | 6 | .    | .  | .  | .     | 4.2 | 4.5 | 0.5 |
| 44 | 68 | M | Prostate | AC |    | T2bN0M0 | II  | 6 | .    | .  | .  | .     | 0   | 0   | 0   |
| 45 | 82 | M | Prostate | AC |    | T2N0M1  | IV  | 6 | .    | .  | .  | .     | 5   | 4.3 | 0.5 |

|    |    |   |          |        |   |         |     |   |   |   |   |   |     |     |     |
|----|----|---|----------|--------|---|---------|-----|---|---|---|---|---|-----|-----|-----|
| 46 | 76 | M | Prostate | AC     |   | T3aN0M0 | III | 6 | . | . | . | . | 4   | 4.3 | 1.8 |
| 47 | 56 | M | Prostate | AC     |   | T2cN1M0 | IV  | 6 | . | . | . | . | 4.9 | 5   | 0.8 |
| 48 | 66 | M | Prostate | AC     |   | T4N0M0  | IV  | 6 | . | . | . | . | 4.5 | 5   | 0.8 |
| 49 | 54 | M | Prostate | AC     |   | T1aN0M0 | II  | 6 | . | . | . | . | 4.8 | 4.7 | 0.8 |
| 50 | 69 | M | Prostate | normal | . | .       | .   | 3 | . | . | . | . | 4.2 | 2.7 | 2.4 |
| 51 | 62 | M | Prostate | normal | . | .       | .   | 3 | . | . | . | . | 3.9 | 4   | 0   |
| 52 | 66 | M | Prostate | normal | . | .       | .   | 3 | . | . | . | . | 4   | 3.4 | 2.5 |
| 53 | 65 | M | Prostate | normal | . | .       | .   | 3 | . | . | . | . | 3.4 | 3   | 0   |
| 54 | 69 | M | Prostate | normal | . | .       | .   | 3 | . | . | . | . | 1.5 | 1   | 0   |
| 55 | 70 | M | Prostate | normal | . | .       | .   | 3 | . | . | . | . | 0.5 | 0.5 | 0   |
| 56 | 70 | M | Prostate | normal | . | .       | .   | 3 | . | . | . | . | 0.5 | 0   | 0   |
| 57 | 63 | M | Prostate | normal | . | .       | .   | 3 | . | . | . | . | 0.7 | 0.7 | 0   |
| 58 | 44 | M | Prostate | normal | . | .       | .   | 3 | . | . | . | . | 2.7 | 2.2 | 2.2 |
| 59 | 59 | M | Prostate | BPH    | . | .       | .   | . | . | . | . | . | 3.3 | 2.7 | 2.2 |
| 60 | 55 | M | Prostate | BPH    | . | .       | .   | . | . | . | . | . | 1.8 | 3.8 | 3.2 |
| 61 | 66 | M | Prostate | BPH    | . | .       | .   | . | . | . | . | . | 0   | 2.8 | 2   |

|    |    |   |          |     |   |   |   |   |   |   |   |   |   |     |     |     |
|----|----|---|----------|-----|---|---|---|---|---|---|---|---|---|-----|-----|-----|
| 62 | 74 | M | Prostate | BPH | . | . | . | . | . | . | . | . | . | 3.3 | 4.1 | 1.8 |
| 63 | 74 | M | Prostate | BPH | . | . | . | . | . | . | . | . | . | 3.1 | 3.3 | 1.6 |
| 64 | 64 | M | Prostate | BPH | . | . | . | . | . | . | . | . | . | 1.8 | 2.5 | 1.8 |
| 65 | 31 | M | Prostate | BPH | . | . | . | . | . | . | . | . | . | 1.6 | 3.7 | 2   |
| 66 | 58 | M | Prostate | BPH | . | . | . | . | . | . | . | . | . | 2.5 | 2.9 | 2.2 |
| 67 | 70 | M | Prostate | BPH | . | . | . | . | . | . | . | . | . | 1   | 2.3 | 1.4 |
| 68 | 64 | M | Prostate | BPH | . | . | . | . | . | . | . | . | . | 1.1 | 2.2 | 2.8 |
| 69 | 67 | M | Prostate | BPH | . | . | . | . | . | . | . | . | . | 1   | 3.4 | 2.6 |
| 70 | 79 | M | Prostate | BPH | . | . | . | . | . | . | . | . | . | 1   | 2.4 | 1.8 |
| 71 | 79 | M | Prostate | BPH | . | . | . | . | . | . | . | . | . | 1.7 | 3   | 1.4 |
| 72 | 59 | M | Prostate | BPH | . | . | . | . | . | . | . | . | . | 2.1 | 1.4 | 2.6 |
| 73 | 61 | M | Prostate | BPH | . | . | . | . | . | . | . | . | . | 2.9 | 3.7 | 2.4 |
| 74 | 55 | M | Prostate | BPH | . | . | . | . | . | . | . | . | . | 3.1 | 3.6 | 2.2 |
| 75 | 58 | M | Prostate | BPH | . | . | . | . | . | . | . | . | . | 2.4 | 1.7 | 2.2 |
| 76 | 74 | M | Prostate | BPH | . | . | . | . | . | . | . | . | . | 2.3 | 2.8 | 1.4 |
| 77 | 64 | M | Prostate | BPH | . | . | . | . | . | . | . | . | . | 3.7 | 2.8 | 1.8 |

|    |    |   |          |     |   |   |   |   |   |   |   |   |     |     |     |
|----|----|---|----------|-----|---|---|---|---|---|---|---|---|-----|-----|-----|
| 78 | 67 | M | Prostate | BPH | . | . | . | . | . | . | . | . | 1.4 | 3   | 2.6 |
| 79 | 64 | M | Prostate | BPH | . | . | . | . | . | . | . | . | 1.6 | 2.3 | 2.6 |
