# Supplementary material for: Nuclear and Cytoplasmic Accumulation of Ep-ICD Is Frequently Detected in Human Epithelial Cancers
Source: PubMed Central journal article supplement (PMC2994724; doi:10.1371/journal.pone.0014130), 2010-11-30
Supplement: pone.0014130.s003.pdf [file pone.0014130.s003.pdf]

**Supplementary Table S2 - Ep-ICD Accumulation and Clinical Parameters of Lung Cancer Patients**

| n  | Age | Sex | Organ | Diagnosis                           | LN*   | pTNM   | Stage | Follow-up months | Follow-up result | Ep-ICD Nucleus | Ep-ICD Cytoplasm | Ep-ICD Membrane |
|----|-----|-----|-------|-------------------------------------|-------|--------|-------|------------------|------------------|----------------|------------------|-----------------|
| 1  | 56  | M   | Lung  | WDSCC                               | 5/43  | T2N1M0 | IIB   | 46               | dead             | 5.5            | 4.2              | 3.3             |
| 2  | 47  | F   | Lung  | MDAC                                | 0/30  | T2N0M0 | IB    | 0                | lost             | 0.7            | 5.3              | 2.7             |
| 3  | 34  | F   | Lung  | WDAC                                | 18/30 | T2N2M0 | IIIA  | 24               | dead             | 0.8            | 4.8              | 2.2             |
| 4  | 69  | F   | Lung  | WDAC                                | 0/15  | T2N0M0 | IB    | 118              | alive            | 5.3            | 5.7              | 2.5             |
| 5  | 59  | M   | Lung  | MDSCC                               | 1/15  | T2N1M0 | IIB   | 117              | alive            | 5.4            | 5.7              | 0.7             |
| 6  | 62  | M   | Lung  | MDSCC                               | 0/8   | T2N0M0 | IB    | 22               | dead             | 0.8            | 4.8              | 1.0             |
| 7  | 42  | M   | Lung  | BAC, NM                             | 7/17  | T4N2M0 | IIIB  | 16               | dead             | 4.8            | 5.5              | 0.3             |
| 8  | 64  | M   | Lung  | WDAC                                | 0/39  | T2N0M0 | IB    | 116              | alive            | 4.8            | 4.8              | 2.0             |
| 9  | 64  | M   | Lung  | WDSCC                               | 0/15  | T2N0M0 | IB    | 15               | dead             | 0.8            | 4.7              | 2.8             |
| 10 | 68  | M   | Lung  | MDSCC                               | 0/16  | T3N0M0 | IIB   | 6                | dead             | 0.3            | 4.7              | 0.8             |
| 11 | 54  | M   | Lung  | carcinosarcoma                      | 0/6   | T3N0M0 | IIB   | 15               | dead             | 5.3            | 5.5              | 0.8             |
| 12 | 73  | M   | Lung  | large cell neuroendocrine carcinoma | 0/7   | T2N0M0 | IB    | 10               | dead             | 6.0            | 5.7              | 0.8             |
| 13 | 66  | M   | Lung  | WDSCC                               | 2/20  | T3N2M0 | IIIA  | 7                | dead             | 5.8            | 4.2              | 0.2             |

|    |    |   |      |                      |      |        |      |     |       |  |     |     |     |
|----|----|---|------|----------------------|------|--------|------|-----|-------|--|-----|-----|-----|
| 14 | 59 | F | Lung | large cell carcinoma | 0/9  | T2N0M0 | IB   | 4   | dead  |  | 5.7 | 4.3 | 0.3 |
| 15 | 59 | M | Lung | WDSCC                | 4/61 | T2N2M0 | IIIA | 10  | dead  |  | 5.8 | 5.0 | 2.8 |
| 16 | 65 | M | Lung | BAC, NM              | 0/8  | T2N0M0 | IB   | 110 | alive |  | 4.8 | 5.5 | 0.8 |
| 17 | 64 | M | Lung | BAC, M               | 0/8  | T2N0M0 | IB   | 112 | alive |  | 5.0 | 2.2 | 5.7 |
| 18 | 61 | M | Lung | MDSCC                | 0/16 | T2N0M0 | IB   | 109 | alive |  | 5.8 | 5.8 | 4.7 |
| 19 | 69 | F | Lung | MDSCC                | 0/34 | T2N0M0 | IB   | 52  | dead  |  | 5.5 | 5.7 | 0.8 |
| 20 | 64 | M | Lung | WDSCC                | 0/17 | T2N0M0 | IB   | 12  | dead  |  | 6.0 | 5.5 | 0.8 |
| 21 | 74 | M | Lung | WDSCC                | 1/46 | T2N1M0 | IIB  | 18  | dead  |  | 4.5 | 5.2 | 0.8 |
| 22 | 53 | F | Lung | SCC, spindle cell    | 0/10 | T2N0M0 | IB   | 92  | dead  |  | 5.2 | 5.7 | 0.7 |
| 23 | 61 | M | Lung | WDSCC                | 1/43 | T2N1M0 | IIB  | 46  | dead  |  | 5.5 | 5.5 | 0.7 |
| 24 | 59 | F | Lung | BAC, M               | 0/24 | T2N0M0 | IB   | 41  | dead  |  | 2.5 | 0.8 | 0.8 |
| 25 | 58 | M | Lung | large cell carcinoma | 0/14 | T2N0M0 | IB   | 100 | alive |  | 5.7 | 5.8 | 0.7 |
| 26 | 77 | M | Lung | MDSCC                | 5/18 | T2N2M0 | IIIA | 20  | dead  |  | 0.8 | 4.2 | 0.3 |
| 27 | 53 | F | Lung | BAC, M               | 0/9  | T4N0M0 | IIIB | 76  | dead  |  | 2.9 | 0.8 | 3.2 |
| 28 | 72 | M | Lung | PDSCC                | 0/18 | T2N0M0 | IB   | 98  | alive |  | 6.0 | 5.0 | 0.5 |

|    |    |   |      |                                           |      |        |      |    |       |     |     |     |
|----|----|---|------|-------------------------------------------|------|--------|------|----|-------|-----|-----|-----|
| 29 | 63 | M | Lung | MDSCC                                     | 1/25 | T2N1M0 | IIB  | 36 | dead  | 6.4 | 5.5 | 3.0 |
| 30 | 63 | M | Lung | MDSCC                                     | 0/22 | T2N0M0 | IB   | 97 | dead  | 0.8 | 5.0 | 1.7 |
| 31 | 59 | M | Lung | MDSCC                                     | 3/21 | T2N1M0 | IIB  | 97 | alive | 6.0 | 4.3 | 0.8 |
| 32 | 62 | M | Lung | PDSCC                                     | 0/50 | T2N0M1 | IV   | 97 | alive | 6.8 | 5.5 | 3.3 |
| 33 | 66 | M | Lung | large cell<br>neuroendocrine<br>carcinoma | 0/38 | T2N0M0 | IB   | 12 | dead  | 0.8 | 5.5 | 0.7 |
| 34 | 58 | M | Lung | MDSCC                                     | 2/18 | T2N1M0 | IIB  | 95 | alive | 6.2 | 5.5 | 0.7 |
| 35 | 55 | F | Lung | PDSCC                                     | 1/3  | T2N1M0 | IIB  | 79 | dead  | 5.0 | 5.5 | 0.3 |
| 36 | 63 | M | Lung | WDSCC                                     | 8/28 | T2N2M0 | IIIA | 3  | dead  | 5.7 | 4.3 | 0.3 |
| 37 | 81 | M | Lung | WDSCC                                     | 0/17 | T2N0M0 | IB   | 94 | alive | 4.8 | 5.8 | 0.5 |
| 38 | 54 | M | Lung | MDSCC                                     | 1/33 | T2N1M0 | IIB  | 25 | dead  | 5.8 | 5.0 | 0.2 |
| 39 | 49 | M | Lung | WDSCC                                     | 0/19 | T2N0M0 | IB   | 91 | alive | 6.5 | 5.5 | 0.3 |
| 40 | 68 | M | Lung | PDSCC                                     | 0/22 | T2N0M0 | IB   | 21 | dead  | 0.7 | 4.8 | 0.0 |
| 41 | 60 | M | Lung | PDSCC                                     | 0/22 | T2N0M0 | IB   | 90 | alive | 5.3 | 5.2 | 0.0 |
| 42 | 65 | M | Lung | large cell<br>carcinoma                   | 0/33 | T2N0M0 | IB   | 90 | alive | 5.2 | 4.7 | 0.5 |
| 43 | 51 | M | Lung | BAC, M                                    | 1/11 | T2N1M0 | IIB  | 90 | alive | 5.7 | 5.5 | 0.3 |

|    |    |   |      |                |       |        |      |     |       |     |     |     |
|----|----|---|------|----------------|-------|--------|------|-----|-------|-----|-----|-----|
| 44 | 56 | M | Lung | WDSCC          | 4/32  | T2N2M0 | IIIA | 25  | dead  | 0.2 | 5.0 | 0.2 |
| 45 | 46 | M | Lung | MDSCC          | 1/25  | T2N1M0 | IIB  | 5   | dead  | 5.8 | 5.2 | 0.3 |
| 46 | 71 | M | Lung | MDSCC          | 0/21  | T2N0M0 | IB   | 89  | alive | 5.0 | 4.5 | 0.8 |
| 47 | 69 | M | Lung | PDSCC          | 0/11  | T2N0M0 | IB   | 73  | dead  | 5.5 | 5.0 | 0.7 |
| 48 | 58 | M | Lung | WDSCC          | 0/24  | T2N0M0 | IB   | 88  | alive | 5.7 | 4.3 | 0.7 |
| 49 | 62 | M | Lung | BAC, NM        | 2/24  | T1N1M0 | IIA  | 41  | dead  | 4.3 | 5.0 | 0.3 |
| 50 | 71 | M | Lung | WDSCC          | 5/40  | T2N1M0 | IIB  | 10  | dead  | 5.3 | 4.8 | 0.5 |
| 51 | 65 | M | Lung | MDSCC          | 0/28  | T3N0M0 | IIB  | 86  | alive | 5.8 | 4.7 | 0.2 |
| 52 | 67 | M | Lung | PDSCC          | 0/12  | T2N0M0 | IB   | 108 | dead  | 5.7 | 4.5 | 0.7 |
| 53 | 64 | M | Lung | PDSCC          | 0/14  | T3N0M0 | IIB  | 6   | dead  | 4.7 | 5.0 | 0.8 |
| 54 | 63 | M | Lung | carcinosarcoma | 0/14  | T2N0M0 | IB   | 39  | dead  | 4.7 | 5.0 | 0.5 |
| 55 | 69 | M | Lung | MDSCC          | 0/20  | T2N0M0 | IB   | 84  | alive | 5.5 | 5.0 | 0.0 |
| 56 | 33 | F | Lung | MDAC           | 0/6   | T2N0M0 | IB   | 83  | alive | 5.0 | 4.7 | 0.2 |
| 57 | 60 | F | Lung | WDAC           | 22/22 | T3N2M0 | IIIA | 14  | dead  | 5.2 | 5.2 | 0.5 |
| 58 | 68 | M | Lung | MDAC           | 0/12  | T2N0M0 | IB   | 80  | alive | 5.2 | 4.5 | 0.7 |
| 59 | 41 | F | Lung | MDAC           | 2/15  | T3N2M0 | IIIA | 20  | dead  | 5.0 | 4.5 | 4.0 |
