# Supplementary material for: Nuclear and Cytoplasmic Accumulation of Ep-ICD Is Frequently Detected in Human Epithelial Cancers
Source: PubMed Central journal article supplement (PMC2994724; doi:10.1371/journal.pone.0014130), 2010-11-30
Supplement: pone.0014130.s004.pdf [file pone.0014130.s004.pdf]

**Supplementary Table S3 - Ep-ICD Accumulation and Clinical Parameters of Colon Cancer Patients**

| n  | Age | Sex | Organ            | Diagnosis | pTNM   | stage | Follow-up months | Follow-up result | Cause of death       | Ep-ICD Membrane | Ep-ICD Cytoplasm | Ep-ICD Nucleus |
|----|-----|-----|------------------|-----------|--------|-------|------------------|------------------|----------------------|-----------------|------------------|----------------|
| 1  | 60  | F   | Ascending colon  | MDAC      | T3N0M0 | IIA   | 132              | alive            | .                    | 4.5             | 5.1              | 4.6            |
| 2  | 58  | F   | Rectum           | MDAC      | T3N1M0 | IIIB  | 8                | dead             | cancer               | 0               | 0                | 0              |
| 3  | 51  | M   | Transverse colon | PDAC      | T3N0M0 | IIA   | 131              | alive            | .                    | 2.3             | 4.1              | 4.6            |
| 4  | 38  | F   | Transverse colon | MDAC      | T3N0M0 | IIA   | 131              | alive            | .                    | 2.5             | 5.7              | 5.2            |
| 5  | 56  | M   | Sigmoid colon    | WDAC      | T3N2M0 | IIIC  | 27               | dead             | brain injury         | 5.8             | 5.8              | 5              |
| 6  | 46  | F   | Cecum            | MDAC      | T2N1M0 | IIB   | 130              | alive            | .                    | 0.83            | 5.5              | 4.7            |
| 7  | 61  | M   | Cecum            | MC        | T3N0M0 | IIA   | 130              | alive            | .                    | 0.83            | 5.67             | 5.67           |
| 8  | 40  | F   | Sigmoid colon    | WDAC      | T3N2M0 | IIIC  | 0                | lost             | .                    | 0.83            | 5.5              | 5.3            |
| 9  | 36  | F   | Descending colon | MDAC      | T3N0M0 | IIA   | 116              | dead             | cerebral haemorrhage | 5.2             | 5.7              | 5              |
| 10 | 68  | M   | Sigmoid colon    | MDAC      | T3N1M0 | IIIB  | 60               | dead             | cancer               | 4.2             | 5.5              | 4.5            |

|    |    |   |                  |      |        |      |     |       |        |      |     |     |
|----|----|---|------------------|------|--------|------|-----|-------|--------|------|-----|-----|
| 11 | 62 | F | Sigmoid colon    | MDAC | T3N0M0 | IIA  | 129 | alive | .      | 4.7  | 4.3 | 0.3 |
| 12 | 65 | M | Ascending colon  | WDAC | T3N2M0 | IIIC | 129 | alive | .      | 0.83 | 5.5 | 4.3 |
| 13 | 65 | M | Sigmoid colon    | MDAC | T3N0M0 | IIA  | 128 | alive | .      | 5    | 5.5 | 4.2 |
| 14 | 72 | F | Sigmoid colon    | WDAC | T3N1M0 | IIIB | 34  | dead  | cancer | 0    | 5   | 0   |
| 15 | 63 | M | Ascending colon  | WDAC | T3N0M0 | IIA  | 128 | alive | .      | 0.3  | 5.5 | 5.7 |
| 16 | 73 | F | Transverse colon | MDAC | T3N0M0 | IIA  | 128 | alive | .      | 5.5  | 5   | 4.3 |
| 17 | 60 | M | Sigmoid colon    | MDAC | T3N0M0 | IIA  | 127 | alive | .      | 4.3  | 5   | 5   |
| 18 | 65 | F | Cecum            | MC   | T3N2M0 | IIIC | 127 | alive | .      | 0.7  | 2.4 | 5.3 |
| 19 | 57 | M | Sigmoid colon    | MDAC | T3N0M1 | IV   | 7   | dead  | cancer | 1.8  | 5.5 | 4.8 |
| 20 | 58 | M | Cecum            | MDAC | T3N0M0 | IIA  | 35  | dead  | cancer | 5.5  | 5.5 | 4.8 |
| 21 | 56 | M | Ascending colon  | MC   | T3N0M0 | IIA  | 78  | dead  | cancer | 5.7  | 5.2 | 4.7 |

|    |    |   |                  |      |        |      |     |       |        |      |      |     |
|----|----|---|------------------|------|--------|------|-----|-------|--------|------|------|-----|
| 22 | 57 | M | Sigmoid colon    | MDAC | T4N0M0 | IIB  | 126 | alive | .      | 0.67 | 4.8  | 5.2 |
| 23 | 56 | M | Ascending colon  | MDAC | T3N1M0 | IIIB | 30  | dead  | cancer | 0.5  | 4.5  | 4.9 |
| 24 | 36 | M | Transverse colon | MDAC | T3N2M0 | IIIC | 2   | dead  | cancer | 0.3  | 5.5  | 5   |
| 25 | 65 | F | Sigmoid colon    | WDAC | T3N0M0 | IIA  | 125 | alive | .      | 1    | 4.3  | 4.4 |
| 26 | 62 | M | Ascending colon  | MDAC | T3N0M0 | IIA  | 125 | alive | .      | 0    | 0    | 0   |
| 27 | 57 | F | Sigmoid colon    | WDAC | T3N1M0 | IIIB | 125 | alive | .      | 0.8  | 4.8  | 4.1 |
| 28 | 78 | M | Sigmoid colon    | WDAC | T3N1M0 | IIIB | 125 | alive | .      | 0    | 0    | 0   |
| 29 | 45 | M | Rectum           | WDAC | T3N1M0 | IIIB | 0   | dead  | cancer | 0.8  | 4.4  | 5.2 |
| 30 | 65 | M | Ascending colon  | WDAC | T3N1M0 | IIIB | 124 | alive | .      | 0.8  | 2.8  | 5.8 |
| 31 | 61 | M | Transverse colon | MC   | T3N0M0 | IIA  | 124 | alive | .      | 0    | 2.15 | 5.8 |
| 32 | 52 | M | Rectum           | MDAC | T3N0M1 | IV   | 42  | dead  | cancer | 0.2  | 5.5  | 5.2 |

|    |    |   |                  |      |        |      |     |       |         |      |     |     |
|----|----|---|------------------|------|--------|------|-----|-------|---------|------|-----|-----|
| 33 | 52 | F | Sigmoid colon    | MDAC | T2N2M0 | IIIC | 124 | alive | .       | 0.5  | 5   | 5.7 |
| 34 | 47 | F | Cecum            | MDAC | T3N0M0 | IIA  | 124 | alive | .       | 0.7  | 4.2 | 5   |
| 35 | 63 | F | Descending colon | MDAC | T3N1M0 | IIIB | 124 | alive | .       | 0    | 0   | 0   |
| 36 | 53 | M | Cecum            | MDAC | T3N1M0 | IIIB | 123 | alive | .       | 1.8  | 4.1 | 5.2 |
| 37 | 53 | F | Transverse colon | WDAC | T3N0M0 | IIA  | 123 | alive | .       | 4.2  | 5   | 4.3 |
| 38 | 64 | M | Sigmoid colon    | MDAC | T3N1M0 | IIIB | 123 | alive | .       | 3.9  | 4.4 | 4.2 |
| 39 | 59 | M | Sigmoid colon    | MDAC | T4N0M0 | IIB  | 122 | alive | .       | 4    | 4.5 | 4.2 |
| 40 | 57 | M | Ascending colon  | MDAC | T3N0M1 | IV   | 12  | dead  | cancer  | 0    | 0   | 0   |
| 41 | 46 | F | Ascending colon  | PDAC | T3N2M0 | IIIC | 2   | dead  | unknown | 0.7  | 0.8 | 4.9 |
| 42 | 59 | M | Ascending colon  | MDAC | T3N0M0 | IIA  | 35  | dead  | cancer  | 0.8  | 5   | 4.8 |
| 43 | 35 | F | Ascending colon  | MC   | T3N0M0 | IIA  | 122 | alive | .       | 0.83 | 5.2 | 5.2 |

|    |    |   |                  |      |        |      |     |       |         |     |     |     |
|----|----|---|------------------|------|--------|------|-----|-------|---------|-----|-----|-----|
| 44 | 42 | M | Transverse colon | MDAC | T3N2M0 | IIIC | 122 | alive | .       | 4.7 | 2.7 | 4.3 |
| 45 | 49 | F | Ascending colon  | MDAC | T3N2M0 | IIIC | 122 | alive | .       | 4.5 | 4.5 | 4   |
| 46 | 76 | M | Sigmoid colon    | MDAC | T3N1M1 | IV   | 57  | dead  | cancer  | 4.8 | 5   | 4.5 |
| 47 | 74 | M | Ascending colon  | MDAC | T3N0M0 | IIA  | 122 | alive | .       | 0.8 | 5   | 5.2 |
| 48 | 60 | F | Rectum           | MDAC | T4N0M0 | IIB  | 122 | alive | .       | 5   | 3.7 | 4.5 |
| 49 | 62 | M | Sigmoid colon    | MDAC | T3N2M1 | IV   | 3   | dead  | cancer  | 0   | 0   | 0   |
| 50 | 62 | M | Sigmoid colon    | MDAC | T3N0M0 | IIA  | 121 | alive | .       | 0   | 0   | 0   |
| 51 | 57 | M | Sigmoid colon    | MDAC | T3N0M0 | IIA  | 83  | dead  | cancer  | 2.8 | 4.7 | 4.8 |
| 52 | 56 | F | Sigmoid colon    | MDAC | T3N2M1 | IV   | 11  | dead  | unknown | 0.3 | 4   | 5.2 |
| 53 | 75 | F | Rectum           | WDAC | T3N1M0 | IIIB | 121 | alive | .       | 1.3 | 4.7 | 4.8 |
| 54 | 58 | M | Ascending colon  | MDAC | T3N0M0 | IIA  | 121 | alive | .       | 1.8 | 5.5 | 5.3 |

|    |    |   |                  |      |        |      |     |       |   |     |     |     |
|----|----|---|------------------|------|--------|------|-----|-------|---|-----|-----|-----|
| 55 | 56 | M | Rectum           | MDAC | T3N1M0 | IIIB | 121 | alive | . | 0.8 | 4.2 | 4.5 |
| 56 | 35 | M | Ascending colon  | MDAC | T2N1M0 | IIIA | 120 | alive | . | 0.5 | 5   | 4.3 |
| 57 | 34 | M | Transverse colon | MDAC | T3N1M0 | IIIB | 120 | alive | . | 0.2 | 4.5 | 4.5 |
| 58 | 60 | M | Descending colon | WDAC | T3N0M0 | IIA  | 120 | alive | . | 0.7 | 5   | 4.7 |
