# Supplementary material for: Nuclear and Cytoplasmic Accumulation of Ep-ICD Is Frequently Detected in Human Epithelial Cancers
Source: PubMed Central journal article supplement (PMC2994724; doi:10.1371/journal.pone.0014130), 2010-11-30
Supplement: pone.0014130.s005.pdf [file pone.0014130.s005.pdf]

**Supplementary Table S4 – Ep-ICD Accumulation and Clinical Parameters of Breast Cancer Patients**

| n  | Age | Sex | Organ  | Diagnosis | pTNM    | Stage | LN*   | ER* | PR* | P53 | Histologic grade** | Tumor Size | Follow-up months | Follow-up result | Ep-ICD Nucelus | Ep-ICD Cytoplasm | Ep-ICD Membrane |
|----|-----|-----|--------|-----------|---------|-------|-------|-----|-----|-----|--------------------|------------|------------------|------------------|----------------|------------------|-----------------|
| 1  | 28  | F   | Breast | IDC       | T3N3aM1 | IV    | 12/15 | —   | +   | —   | II                 | 6.0 cm     | 47               | Dead             | 5.2            | 4.7              | 0.7             |
| 2  | 28  | F   | Breast | IDC       | T3N3aM1 | IV    | 12/15 | —   | +   | —   | II                 | 6.0 cm     | 47               | dead             | 5              | 4.8              | 0.3             |
| 3  | 47  | F   | Breast | IDC       | T2N2aM0 | IIIA  | 5/22  | —   | —   | +   | III                | 3.5 cm     | 107              | alive            | 4.8            | 5.3              | 0.7             |
| 4  | 47  | F   | Breast | IDC       | T2N2aM0 | IIIA  | 5/22  | —   | —   | +   | III                | 3.5 cm     | 107              | alive            | 5.2            | 5.2              | 1.2             |
| 5  | 39  | F   | Breast | IDC       | T2N0M0  | IIA   | 0/16  | —   | +   | +   | II                 | 3.5 cm     | 107              | alive            | 5.2            | 5.2              | 0.7             |
| 6  | 39  | F   | Breast | IDC       | T2N0M0  | IIA   | 0/16  | —   | +   | +   | II                 | 3.5 cm     | 107              | alive            | 5.2            | 5                | 1               |
| 7  | 48  | F   | Breast | IDC       | T2N2aM0 | IIA   | 5/22  | —   | —   | —   | III                | 3.5 cm     | 105              | alive            | 4.7            | 4.7              | 0.7             |
| 8  | 48  | F   | Breast | IDC       | T2N2aM0 | IIA   | 5/22  | —   | —   | —   | III                | 3.5 cm     | 105              | alive            | 5              | 4.8              | 0.3             |
| 9  | 60  | F   | Breast | IDC       | T2N0M0  | IIA   | 0/9   | —   | —   | +   | II                 | 2.7 cm     | 104              | alive            | 4.9            | 4.9              | 0.7             |
| 10 | 60  | F   | Breast | IDC       | T2N0M0  | IIA   | 0/9   | —   | —   | +   | II                 | 2.7 cm     | 104              | alive            | 4.8            | 4                | 0.3             |
| 11 | 54  | F   | Breast | IDC       | T3N1aM1 | IV    | 01/16 | +   | —   | —   | II                 | 6.5 cm     | 103              | alive            | 4.7            | 5                | 1.3             |
| 12 | 54  | F   | Breast | IDC       | T3N1aM1 | IV    | 01/16 | +   | —   | —   | II                 | 6.5 cm     | 103              | alive            | 4.7            | 5                | 1.2             |
| 13 | 43  | F   | Breast | IDC       | T3N0M0  | IIB   | 0/9   | —   | —   | +   | I                  | 5.0 cm     | 103              | alive            | 0              | 0                | 0               |
| 14 | 43  | F   | Breast | IDC       | T3N0M0  | IIB   | 0/9   | —   | —   | +   | I                  | 5.0 cm     | 103              | alive            | 0              | 0                | 0               |
| 15 | 42  | F   | Breast | IDC       | T2N2aM0 | IIIA  | 5/19  | +   | +   | —   | II                 | 3.0 cm     | 103              | alive            | 5.7            | 5                | 0.2             |
| 16 | 42  | F   | Breast | IDC       | T2N2aM0 | IIIA  | 5/19  | +   | +   | —   | II                 | 3.0 cm     | 103              | alive            | 6.2            | 5.2              | 0.3             |
| 17 | 40  | F   | Breast | IDC       | T2N3aM0 | IIIC  | 18/21 | +   | +   | —   | II                 | 2.5 cm     | 58               | dead             | 5.2            | 5.2              | 0.2             |
| 18 | 40  | F   | Breast | IDC       | T2N3aM0 | IIIC  | 18/21 | +   | +   | —   | II                 | 2.5 cm     | 58               | dead             | 4.6            | 4.4              | 0.8             |
| 19 | 41  | F   | Breast | IDC       | T2N1aM0 | IIB   | 2/18  | —   | +   | +   | I                  | 4.0 cm     | 102              | alive            | 5.3            | 5.3              | 0.3             |
| 20 | 41  | F   | Breast | IDC       | T2N1aM0 | IIB   | 2/18  | —   | +   | +   | I                  | 4.0 cm     | 102              | alive            | 5.7            | 6                | 1.3             |
| 21 | 57  | F   | Breast | IDC       | T2N3aM0 | IIIC  | 15/24 | —   | —   | +   | II                 | 2.5 cm     | 11               | dead             | 0              | 0                | 0               |



|    |    |   |        |     |   |   |   |   |   |   |   |   |   |   |     |     |   |
|----|----|---|--------|-----|---|---|---|---|---|---|---|---|---|---|-----|-----|---|
| 43 | 47 | F | Breast | IDC | . | . | . | . | . | . | . | . | . | . | 0   | 0   | 0 |
| 44 | 47 | F | Breast | IDC | . | . | . | . | . | . | . | . | . | . | 1   | 1   | 0 |
| 45 | 39 | F | Breast | IDC | . | . | . | . | . | . | . | . | . | . | 0   | 1   | 0 |
| 46 | 39 | F | Breast | IDC | . | . | . | . | . | . | . | . | . | . | 1   | 0.8 | 0 |
| 47 | 48 | F | Breast | IDC | . | . | . | . | . | . | . | . | . | . | 0.2 | 0.4 | 0 |
| 48 | 48 | F | Breast | IDC | . | . | . | . | . | . | . | . | . | . | 0.9 | 1.4 | 0 |
| 49 | 60 | F | Breast | IDC | . | . | . | . | . | . | . | . | . | . | 0.9 | 1.2 | 0 |
| 50 | 60 | F | Breast | IDC | . | . | . | . | . | . | . | . | . | . | 1.4 | 1.5 | 0 |
| 51 | 54 | F | Breast | IDC | . | . | . | . | . | . | . | . | . | . | 0.8 | 1.2 | 0 |
| 52 | 54 | F | Breast | IDC | . | . | . | . | . | . | . | . | . | . | 0   | 0.2 | 0 |
| 53 | 43 | F | Breast | IDC | . | . | . | . | . | . | . | . | . | . | 0.2 | 0.2 | 0 |
| 54 | 43 | F | Breast | IDC | . | . | . | . | . | . | . | . | . | . | 1.7 | 1.9 | 0 |
| 55 | 42 | F | Breast | IDC | . | . | . | . | . | . | . | . | . | . | 0.4 | 0.4 | 0 |
| 56 | 42 | F | Breast | IDC | . | . | . | . | . | . | . | . | . | . | 0   | 0   | 0 |
| 57 | 40 | F | Breast | IDC | . | . | . | . | . | . | . | . | . | . | 0   | 0   | 0 |
| 58 | 40 | F | Breast | IDC | . | . | . | . | . | . | . | . | . | . | 0.2 | 0.2 | 0 |
| 59 | 41 | F | Breast | IDC | . | . | . | . | . | . | . | . | . | . | 1   | 1.2 | 0 |
| 60 | 41 | F | Breast | IDC | . | . | . | . | . | . | . | . | . | . | 1.4 | 1.5 | 0 |
