# Supplementary material for: Nuclear and Cytoplasmic Accumulation of Ep-ICD Is Frequently Detected in Human Epithelial Cancers
Source: PubMed Central journal article supplement (PMC2994724; doi:10.1371/journal.pone.0014130), 2010-11-30
Supplement: pone.0014130.s006.pdf [file pone.0014130.s006.pdf]

**Supplementary Table S5 - Ep-ICD Accumulation and Clinical Parameters of Liver Cancer Patients**

| <b>n</b> | <b>Organ</b> | <b>Diagnosis</b>                               | <b>Age</b> | <b>Sex</b> | <b>pTNM</b> | <b>Stage</b> | <b>Ep-ICD Nucleus</b> | <b>Ep-ICD Cytoplasm</b> | <b>Ep-ICD Membrane</b> |
|----------|--------------|------------------------------------------------|------------|------------|-------------|--------------|-----------------------|-------------------------|------------------------|
| 1        | Liver        | combined hepatocellular and cholangiocarcinoma | 32         | M          | T3N0M0      | IIIA         | 6.0                   | 5.5                     | 0.2                    |
| 2        | Liver        | hepatocellular carcinoma                       | 57         | M          | T3N0M0      | IIIA         | 5.3                   | 4.8                     | 1.0                    |
| 3        | Liver        | hepatocellular carcinoma                       | 58         | F          | T3N0M0      | IIIA         | 4.5                   | 1.9                     | 4.5                    |
| 4        | Liver        | hepatocellular carcinoma                       | 20         | M          | T4N0M0      | IIIB         | 5.3                   | 5.0                     | 0.7                    |
| 5        | Liver        | hepatocellular carcinoma                       | 66         | F          | T1N0M0      | I            | 5.0                   | 4.8                     | 0.5                    |
| 6        | Liver        | hepatocellular carcinoma                       | 61         | M          | T1N0M0      | I            | 5.0                   | 4.8                     | 0.7                    |
| 7        | Liver        | hepatocellular carcinoma                       | 52         | M          | T3N0M0      | IIIA         | 4.5                   | 4.8                     | 0.0                    |
| 8        | Liver        | combined hepatocellular and cholangiocarcinoma | 50         | M          | T3N1M0      | IIIC         | 4.5                   | 4.8                     | 0.0                    |
| 9        | Liver        | hepatocellular carcinoma                       | 56         | M          | T3N0M0      | IIIA         | 4.7                   | 5.0                     | 0.3                    |
