# Supplementary material for: Nuclear and Cytoplasmic Accumulation of Ep-ICD Is Frequently Detected in Human Epithelial Cancers
Source: PubMed Central journal article supplement (PMC2994724; doi:10.1371/journal.pone.0014130), 2010-11-30
Supplement: pone.0014130.s007.pdf [file pone.0014130.s007.pdf]

**Supplementary Table S6 - Ep-ICD Accumulation and Clinical Parameters of Bladder Cancer Patients**

| <b>n</b> | <b>Organ</b> | <b>Diagnosis</b>                             | <b>Age</b> | <b>Sex</b> | <b>pTNM</b> | <b>Stage</b> | <b>Ep-ICD Nucleus</b> | <b>Ep-ICD Cytoplasm</b> | <b>Ep-ICD Membrane</b> |
|----------|--------------|----------------------------------------------|------------|------------|-------------|--------------|-----------------------|-------------------------|------------------------|
| 1        | Bladder      | mucinous adenocarcinoma from urachal remnant | 53         | M          | T4bN0M0     | IV           | 2.4                   | 2.4                     | .5                     |
| 2        | Bladder      | TCC                                          | 60         | M          | T3bN1M0     | IV           | 4.3                   | 4.7                     | .2                     |
| 3        | Bladder      | TCC                                          | 60         | M          | T3bN1M0     | IV           | 4.7                   | 4.8                     | .3                     |
| 4        | Bladder      | TCC                                          | 65         | M          | T4aN1M1     | IV           | 4.7                   | 4.5                     | .0                     |
| 5        | Bladder      | TCC                                          | 74         | M          | T1N0M0      | I            | 5.0                   | 5.0                     | 1.0                    |
| 6        | Bladder      | TCC                                          | 63         | F          | T1N0M0      | I            | 4.7                   | 5.0                     | 1.0                    |
| 7        | Bladder      | TCC                                          | 58         | M          | T3NxM0      | III          | 4.2                   | 5.0                     | .8                     |
| 8        | Bladder      | TCC                                          | 46         | M          | T1N0M0      | I            | 6.0                   | 4.8                     | .3                     |
| 9        | Bladder      | TCC                                          | 76         | M          | T3NxM0      | III          | 5.8                   | 4.8                     | .3                     |
| 10       | Bladder      | TCC                                          | 63         | M          | T3bN0M0     | III          | 5.0                   | 4.3                     | .3                     |
