# Supplementary material for: Nuclear and Cytoplasmic Accumulation of Ep-ICD Is Frequently Detected in Human Epithelial Cancers
Source: PubMed Central journal article supplement (PMC2994724; doi:10.1371/journal.pone.0014130), 2010-11-30
Supplement: pone.0014130.s008.pdf [file pone.0014130.s008.pdf]

**Supplementary Table S7 - Ep-ICD Accumulation and Clinical Parameters of Ovarian Cancer Patients**

| <b>n</b> | <b>Organ</b> | <b>Diagnosis</b>                       | <b>Age</b> | <b>Sex</b> | <b>pTNM</b> | <b>Stage</b> | <b>Ep-ICD Nucleus</b> | <b>Ep-ICD Cytoplasm</b> | <b>Ep-ICD Membrane</b> |
|----------|--------------|----------------------------------------|------------|------------|-------------|--------------|-----------------------|-------------------------|------------------------|
| 1        | Ovary        | SAC                                    | 57         | F          | T3bN1M0     | IIIC         | 4.8                   | 5.5                     | 0                      |
| 2        | Ovary        | SAC, MD                                | 48         | F          | T3cN0M0     | IIIC         | 4.2                   | 5.0                     | 1                      |
| 3        | Ovary        | Serous Surface Papillary Carcinoma, PD | 60         | F          | T2cN0M0     | IIC          | 4.8                   | 5.2                     | 1                      |
| 4        | Ovary        | SAC, MD                                | 41         | F          | T2cN1M0     | IIIC         | 5.0                   | 5.0                     | 1                      |
| 5        | Ovary        | SAC                                    | 64         | F          | T3cN0M0     | IIIC         | 4.2                   | 5.0                     | 0                      |
| 6        | Ovary        | SAC                                    | 60         | F          | T3cN1M0     | IIIC         | 4.5                   | 5.0                     | 0                      |
| 7        | Ovary        | SAC                                    | 54         | F          | T3aN0M0     | IIIA         | 4.7                   | 5.5                     | 0                      |
| 8        | Ovary        | SAC                                    | 58         | F          | T2cN0M0     | IIC          | 4.8                   | 5.0                     | 1                      |
| 9        | Ovary        | Mucinous Adenocarcinoma                | 16         | F          | T1aN0M0     | IA           | 5.7                   | 4.7                     | 1                      |
| 10       | Ovary        | SAC, PD                                | 57         | F          | T3cN0M0     | IIIC         | 4.2                   | 4.7                     | 4                      |
