# Supplementary material for: Nuclear and Cytoplasmic Accumulation of Ep-ICD Is Frequently Detected in Human Epithelial Cancers
Source: PubMed Central journal article supplement (PMC2994724; doi:10.1371/journal.pone.0014130), 2010-11-30
Supplement: pone.0014130.s009.pdf [file pone.0014130.s009.pdf]

**Supplementary Table S8 - Ep-ICD Accumulation and Clinical Parameters of Pancreatic Cancer Patients**

| <b>n</b> | <b>Organ</b> | <b>Diagnosis</b> | <b>Age</b> | <b>Sex</b> | <b>pTNM</b> | <b>Stage</b> | <b>Ep-ICD Nucleus</b> | <b>Ep-ICD Cytoplasm</b> | <b>Ep-ICD Membrane</b> |
|----------|--------------|------------------|------------|------------|-------------|--------------|-----------------------|-------------------------|------------------------|
| 1        | Pancreas     | MDDAC            | 66         | M          | T4N1M0      | III          | 2.7                   | 2.7                     | 0.7                    |
| 2        | Pancreas     | MDDAC            | 71         | M          | T3N1M0      | IIB          | 3.8                   | 3.8                     | 0.7                    |
| 3        | Pancreas     | MDDAC            | 68         | M          | T3N1M0      | IIB          | 4.0                   | 3.5                     | 0.3                    |
| 4        | Pancreas     | MDDAC            | 45         | M          | T3N1M0      | IIB          | 3.5                   | 4.0                     | 0.0                    |
| 5        | Pancreas     | MDDAC            | 64         | F          | T4N0M0      | III          | 5.2                   | 5.0                     | 0.8                    |
| 6        | Pancreas     | MDDAC            | 64         | F          | T3N1M0      | IIB          | 2.5                   | 2.5                     | 1.0                    |
| 7        | Pancreas     | PDDAC            | 69         | M          | T4NxM0      | III          | 1.8                   | 2.5                     | 0.8                    |
| 8        | Pancreas     | MDDAC            | 46         | M          | T3N1M0      | IIB          | 4.2                   | 0.8                     | 0.8                    |
| 9        | Pancreas     | MDDAC            | 54         | M          | T3N1M0      | IIB          | 3.7                   | 0.7                     | 0.8                    |
| 10       | Pancreas     | MDDAC            | 40         | M          | T3N1M0      | IIB          | 3.5                   | 4.0                     | 1.0                    |
