# Supplementary material for: Nuclear and Cytoplasmic Accumulation of Ep-ICD Is Frequently Detected in Human Epithelial Cancers
Source: PubMed Central journal article supplement (PMC2994724; doi:10.1371/journal.pone.0014130), 2010-11-30
Supplement: pone.0014130.s010.pdf [file pone.0014130.s010.pdf]

**Supplementary Table S9 - Ep-ICD Accumulation and Clinical Parameters of HNSCC Patients**

| <b>N</b> | <b>Gender</b> | <b>Tissue Type</b> | <b>pTNM</b> | <b>Diagnosis</b> | <b>Follow-Up Result</b> | <b>Follow-Up Time (Months)</b> | <b>Ep-ICD Nucleus</b> | <b>Ep-ICD Cytoplasm</b> | <b>Ep-ICD Membrane</b> |
|----------|---------------|--------------------|-------------|------------------|-------------------------|--------------------------------|-----------------------|-------------------------|------------------------|
| 1        | M             | Head and Neck      | T4N1M0      | WDSCC            | DEAD                    | 9                              | 0                     | 0                       | 0                      |
| 2        | F             | Head and Neck      | T4N1M0      | WDSCC            | RECURRENCE              | 14                             | 0                     | 0                       | 0                      |
| 3        | F             | Head and Neck      | T3N2bM0     | WDSCC            | DEAD                    | 13                             | 5                     | 6                       | 0                      |
| 4        | M             | Head and Neck      | T4N2bM0     | MDSCC            | DEAD                    | 8                              | 7                     | 7                       | 0                      |
| 5        | M             | Head and Neck      | T4N0M0      | WDSCC            | NAD                     | 31                             | 6                     | 5                       | 0                      |
| 6        | F             | Head and Neck      | T3N0M0      | WDSCC            | NAD                     | 30                             | 4                     | 5                       | 0                      |
| 7        | M             | Head and Neck      | T3N2aM0     | MDSCC            | NAD                     | 28                             | 0                     | 3                       | 0                      |
| 8        | M             | Head and Neck      | T3N2aM0     | WDSCC            | RECURRENCE              | 7                              | 6                     | 7                       | 0                      |
| 9        | M             | Head and Neck      | T3N2aM0     | WDSCC            | NAD                     | 29                             | 0                     | 0                       | 0                      |
| 10       | M             | Head and Neck      | T4N1M0      | MDSCC            | DEAD                    | 8                              | 5                     | 4                       | 0                      |
| 11       | M             | Head and Neck      | T3N0M0      | MDSCC            | NAD                     | 28                             | 7                     | 7                       | 0                      |
| 12       | M             | Head and Neck      | T4N1M0      | WDSCC            | NAD                     | 28                             | 7                     | 7                       | 0                      |
| 13       | M             | Head and Neck      | T4N1M0      | WDSCC            | NAD                     | 18                             | 7                     | 7                       | 0                      |

|    |   |               |         |       |            |    |   |   |   |
|----|---|---------------|---------|-------|------------|----|---|---|---|
| 14 | M | Head and Neck | T4N2cM0 | MDSCC | DEAD       | 6  | 0 | 5 | 0 |
| 15 | M | Head and Neck | T2N2aM0 | WDSCC | RECURRENCE | 6  | 5 | 5 | 0 |
| 16 | M | Head and Neck | T4N2bM0 | MDSCC | RECURRENCE | 6  | 0 | 0 | 0 |
| 17 | M | Head and Neck | T3N1M0  | WDSCC | NAD        | 24 | 5 | 6 | 0 |
| 18 | M | Head and Neck | T4N0M0  | WDSCC | RECURRENCE | 8  | 2 | 6 | 0 |
| 19 | F | Head and Neck | T3N0M0  | WDSCC | NAD        | 23 | 5 | 4 | 0 |
| 20 | M | Head and Neck | T4N1M0  | MDSCC | DEAD       | 3  | 7 | 7 | 0 |
| 21 | M | Head and Neck | T4N1M0  | WDSCC | NAD        | 21 | 0 | 5 | 0 |
| 22 | M | Head and Neck | T4N2aM0 | MDSCC | DEAD       | 3  | 4 | 6 | 0 |
| 23 | M | Head and Neck | T3N2bM0 | WDSCC | DEAD       | 3  | 5 | 5 | 0 |
| 24 | M | Head and Neck | T2N2bM0 | MDSCC | DEAD       | 3  | 6 | 6 | 0 |
| 25 | F | Head and Neck | T3N1M0  | WDSCC | DEAD       | 18 | 7 | 6 | 0 |
| 26 | M | Head and Neck | T3N0M0  | MDSCC | NAD        | 19 | 7 | 5 | 0 |
| 27 | M | Head and Neck | T4N0M0  | WDSCC | RECURRENCE | 11 | 5 | 6 | 0 |
| 28 | F | Head and Neck | T3N2M0  | MDSCC | NAD        | 17 | 7 | 5 | 0 |
| 29 | F | Head and Neck | T2N1Mo  | MDSCC | NAD        | 17 | 5 | 5 | 0 |

|    |   |               |         |       |            |    |   |   |   |
|----|---|---------------|---------|-------|------------|----|---|---|---|
| 30 | M | Head and Neck | T3N2bM0 | MDSCC | NAD        | 16 | 5 | 6 | 0 |
| 31 | M | Head and Neck | T3N2bM0 | WDSCC | DEAD       | 8  | 3 | 3 | 0 |
| 32 | M | Head and Neck | T2N1M0  | WDSCC | NAD        | 16 | 7 | 6 | 0 |
| 33 | M | Head and Neck | T4N2cM0 | MDSCC | NAD        | 16 | 7 | 7 | 0 |
| 34 | M | Head and Neck | T2N1M0  | WDSCC | NAD        | 17 | 7 | 7 | 0 |
| 35 | M | Head and Neck | T1N1M0  | WDSCC | NAD        | 15 | 7 | 7 | 0 |
| 36 | M | Head and Neck | T4N0M0  | WDSCC | NAD        | 14 | 7 | 6 | 0 |
| 37 | F | Head and Neck | T3N0M0  | WDSCC | NAD        | 14 | 4 | 6 | 0 |
| 38 | M | Head and Neck | T4N2cM0 | MDSCC | DEAD       | 9  | 6 | 6 | 0 |
| 39 | M | Head and Neck | T3N0M0  | WDSCC | NAD        | 11 | 6 | 7 | 0 |
| 40 | M | Head and Neck | T3N0M0  | MDSCC | NAD        | 11 | 0 | 0 | 0 |
| 41 | M | Head and Neck | T3N0M0  | WDSCC | RECURRENCE | 6  | 5 | 5 | 0 |
| 42 | F | Head and Neck | T4N1M0  | WDSCC | DEAD       | 2  | 0 | 5 | 0 |
| 43 | M | Head and Neck | T4N1M0  | MDSCC | NAD        | 12 | 0 | 0 | 0 |
| 44 | M | Head and Neck | T3N2bM0 | WDSCC | NAD        | 11 | 6 | 6 | 0 |
| 45 | M | Head and Neck | T4N2cM0 | WDSCC | NAD        | 12 | 4 | 5 | 0 |

|    |   |               |         |        |            |    |   |   |   |
|----|---|---------------|---------|--------|------------|----|---|---|---|
| 46 | M | Head and Neck | T4N1M0  | MDSCC  | DEAD       | 7  | 6 | 6 | 0 |
| 47 | M | Head and Neck | T4N0M0  | MDSCC  | NAD        | 10 | 6 | 5 | 0 |
| 48 | M | Head and Neck | T4N0M0  | WDSCC  | NAD        | 10 | 0 | 0 | 0 |
| 49 | M | Head and Neck | T3N2bM0 | WDSCC  | DEAD       | 9  | 5 | 5 | 0 |
| 50 | M | Head and Neck | T4N2M0  | MDSCC  | DEAD       | 12 | 0 | 0 | 0 |
| 51 | M | Head and Neck | T2N2M0  | MDSCC  | RECURRENCE | 20 | 0 | 0 | 0 |
| 52 | M | Head and Neck | T3N1M0  | MDSCC  | RECURRENCE | 3  | 0 | 0 | 0 |
| 53 | M | Head and Neck | T4N0M0  | MDSCC  | DEAD       | 14 | 7 | 7 | 0 |
| 54 | F | Head and Neck | T3N1M0  | WDSCC  | NAD        | 27 | 0 | 0 | 0 |
| 55 | M | Head and Neck | T4N1M0  | WDSCC  | DEAD       | 7  | 0 | 0 | 0 |
| 56 | F | Head and Neck | T4N2M0  | MDSCC  | DEAD       | 6  | 0 | 4 | 0 |
| 57 | M | Head and Neck | T2N1M0  | WDSCC  | DEAD       | 8  | 0 | 0 | 0 |
| 58 |   | Head and Neck |         | Normal |            |    | 0 | 0 | 0 |
| 59 |   | Head and Neck |         | Normal |            |    | 0 | 0 | 0 |
| 60 |   | Head and Neck |         | Normal |            |    | 0 | 0 | 0 |
| 61 |   | Head and Neck |         | Normal |            |    | 4 | 4 | 0 |

|    |  |               |  |        |  |  |   |   |   |
|----|--|---------------|--|--------|--|--|---|---|---|
| 62 |  | Head and Neck |  | Normal |  |  | 0 | 0 | 0 |
| 63 |  | Head and Neck |  | Normal |  |  | 0 | 0 | 0 |
| 64 |  | Head and Neck |  | Normal |  |  | 2 | 3 | 0 |
| 65 |  | Head and Neck |  | Normal |  |  | 0 | 0 | 0 |
| 66 |  | Head and Neck |  | Normal |  |  | 0 | 0 | 0 |
| 67 |  | Head and Neck |  | Normal |  |  | 0 | 0 | 0 |
| 68 |  | Head and Neck |  | Normal |  |  | 0 | 3 | 0 |
| 69 |  | Head and Neck |  | Normal |  |  | 0 | 0 | 0 |
| 70 |  | Head and Neck |  | Normal |  |  | 0 | 0 | 0 |
| 71 |  | Head and Neck |  | Normal |  |  | 0 | 0 | 0 |
| 72 |  | Head and Neck |  | Normal |  |  | 0 | 0 | 0 |
| 73 |  | Head and Neck |  | Normal |  |  | 0 | 0 | 0 |
| 74 |  | Head and Neck |  | Normal |  |  | 0 | 0 | 0 |
| 75 |  | Head and Neck |  | Normal |  |  | 0 | 0 | 0 |
| 76 |  | Head and Neck |  | Normal |  |  | 0 | 0 | 0 |
| 77 |  | Head and Neck |  | Normal |  |  | 0 | 0 | 0 |
