# Supplementary material for: Nuclear and Cytoplasmic Accumulation of Ep-ICD Is Frequently Detected in Human Epithelial Cancers
Source: PubMed Central journal article supplement (PMC2994724; doi:10.1371/journal.pone.0014130), 2010-11-30
Supplement: pone.0014130.s011.pdf [file pone.0014130.s011.pdf]

**Supplementary Table S10 - Ep-ICD Accumulation and Clinical Parameters of ESCC Patients**

| <b>n</b> | <b>Tissue Type</b> | <b>Histopath</b> | <b>TNM</b> | <b>Ep-ICD Nucleus</b> | <b>Ep-ICD Cytoplasm</b> | <b>Ep-ICD Membrane</b> |
|----------|--------------------|------------------|------------|-----------------------|-------------------------|------------------------|
| 1        | Esophagus          | PDSCC            | T3N1M0     | 0                     | 6                       | 0                      |
| 2        | Esophagus          | WDSCC            | T2N0M0     | 0                     | 5                       | 0                      |
| 3        | Esophagus          | WDSCC            | T3N1M0     | 5                     | 6                       | 0                      |
| 4        | Esophagus          | WDSCC            | T2N0M0     | 0                     | 4                       | 0                      |
| 5        | Esophagus          | WDSCC            | T3N1M0     | 0                     | 3                       | 0                      |
| 6        | Esophagus          | WDSCC            | T2N1M0     | 0                     | 6                       | 0                      |
| 7        | Esophagus          | WDSCC            | T2N1M0     | 0                     | 0                       | 0                      |
| 8        | Esophagus          | WDSCC            | —          | 0                     | 7                       | 0                      |
| 9        | Esophagus          | WDSCC            | T2N1M0     | 0                     | 0                       | 0                      |
| 10       | Esophagus          | SCC              | T2N0M0     | 0                     | 5                       | 0                      |
| 11       | Esophagus          | SCC              | T2N0M0     | 0                     | 7                       | 0                      |
| 12       | Esophagus          | SCC              | —          | 7                     | 7                       | 0                      |
| 13       | Esophagus          | SCC              | T2N0M0     | 0                     | 4                       | 0                      |
| 14       | Esophagus          | SCC              | T4N1M0     | 7                     | 7                       | 0                      |
| 15       | Esophagus          | SCC              | T3N1M0     | 3                     | 0                       | 0                      |
| 16       | Esophagus          | SCC              | —          | 0                     | 0                       | 0                      |
| 17       | Esophagus          | SCC              | —          | 6                     | 6                       | 0                      |
| 18       | Esophagus          | SCC              | T3N1M0     | 5                     | 6                       | 0                      |
| 19       | Esophagus          | SCC              | T2N0M0     | 0                     | 0                       | 0                      |
| 20       | Esophagus          | PDSCC            | T3N1M0     | 0                     | 0                       | 0                      |
| 21       | Esophagus          | PDSCC            | T3N1M0     | 4                     | 5                       | 0                      |
| 22       | Esophagus          | PDSCC            | T3N1M0     | 0                     | 0                       | 0                      |
| 23       | Esophagus          | PDSCC            | T4N1M0     | 6                     | 7                       | 0                      |
| 24       | Esophagus          | PDSCC            | T4N1M0     | 7                     | 7                       | 0                      |
| 25       | Esophagus          | PDSCC            | T3N1M0     | 0                     | 7                       | 0                      |
| 26       | Esophagus          | PDSCC            | T3N1M0     | 0                     | 7                       | 0                      |
| 27       | Esophagus          | PDSCC            | T3N1M0     | 0                     | 0                       | 0                      |
| 28       | Esophagus          | PDSCC            | T3N1M0     | 0                     | 0                       | 0                      |
| 29       | Esophagus          | MDSCC            | T2N0M0     | 0                     | 0                       | 0                      |
| 30       | Esophagus          | MDSCC            | T3N1M0     | 0                     | 5                       | 0                      |
| 31       | Esophagus          | MDSCC            | T3N0M0     | 0                     | 6                       | 0                      |
| 32       | Esophagus          | MDSCC            | T3N1M0     | 0                     | 0                       | 0                      |
| 33       | Esophagus          | MDSCC            | T3N0M0     | 0                     | 0                       | 0                      |
| 34       | Esophagus          | MDSCC            | T2N1M0     | 5                     | 6                       | 0                      |
| 35       | Esophagus          | MDSCC            | T3N1M0     | 5                     | 7                       | 0                      |
| 36       | Esophagus          | MDSCC            | T3N1M0     | 7                     | 7                       | 0                      |
| 37       | Esophagus          | MDSCC            | T3N1M0     | 5                     | 6                       | 0                      |
| 38       | Esophagus          | MDSCC            | T3N1M0     | 0                     | 7                       | 0                      |
| 39       | Esophagus          | Dys              | —          | 0                     | 0                       | 0                      |
| 40       | Esophagus          | AC               | T2N0M0     | 0                     | 5                       | 0                      |
| 41       | Esophagus          | AC               | T3N1Mx     | 6                     | 6                       | 0                      |
| 42       | Esophagus          | AC               | T3N0M0     | 4                     | 6                       | 0                      |

|    |           |        |        |   |   |   |
|----|-----------|--------|--------|---|---|---|
| 43 | Esophagus | AC     | T3N1M0 | 6 | 7 | 0 |
| 44 | Esophagus | AC     | T4N1M0 | 7 | 7 | 0 |
| 45 | Esophagus | AC     | —      | 4 | 6 | 0 |
| 46 | Esophagus | AC     | T4N1M0 | 0 | 7 | 0 |
| 47 | Esophagus | Normal | —      | 0 | 0 | 0 |
| 48 | Esophagus | Normal | —      | 0 | 0 | 0 |
| 49 | Esophagus | Normal | —      | 3 | 5 | 0 |
| 50 | Esophagus | Normal | —      | 0 | 4 | 0 |
| 51 | Esophagus | Normal | —      | 0 | 3 | 0 |
| 52 | Esophagus | Normal | —      | 0 | 0 | 0 |
| 53 | Esophagus | Normal | —      | 0 | 0 | 0 |
| 54 | Esophagus | Normal | —      | 0 | 0 | 0 |
| 55 | Esophagus | Normal | —      | 0 | 0 | 0 |
| 56 | Esophagus | Normal | —      | 0 | 0 | 0 |
| 57 | Esophagus | Normal | —      | 0 | 3 | 0 |
| 58 | Esophagus | Normal | —      | 0 | 4 | 0 |
| 59 | Esophagus | Normal | —      | 0 | 0 | 0 |
| 60 | Esophagus | Normal | —      | 0 | 0 | 0 |
| 61 | Esophagus | Normal | —      | 7 | 7 | 0 |
| 62 | Esophagus | Normal | —      | 4 | 4 | 0 |
| 63 | Esophagus | Normal | —      | 0 | 4 | 0 |
| 64 | Esophagus | Normal | —      | 0 | 0 | 0 |
| 65 | Esophagus | Normal | —      | 0 | 0 | 0 |
| 66 | Esophagus | Normal | —      | 0 | 0 | 0 |
